# Supplementary material for: Hit integration for identifying optimal spaced seeds
Source: PubMed Central journal article supplement (PMC3009509; doi:10.1186/1471-2105-11-s1-s37), 2010-01-18
Supplement: 1471-2105-11-S1-S37-S1.pdf [file 1471-2105-11-S1-S37-S1.pdf]

## Additional file 1

### Mathematical Proofs for Hit Integration

We prove three lemmas used for Equation (7) ~ Equation (10); The first lemma is for Equation (7), the second is for Equation (8) and Equation (9), and the third is for Equation (10).

**Lemma 1** *The function  $I$  can be solved by a recursive function such as*

$$I^n[i, b] = I^n[i, 0b] + I^{(n+1)}[i, 1b] - I^{(n+1)}[i, 0b].$$

**Proof)** By applying Equation (3), the right terms are derived directly.

$$\begin{aligned} I^n[i, b] &= \int p^n f[i, b] dp \\ &= \int p^n (p \cdot f[i, 1b] + (1-p)f[i, 0b]) dp \\ &= \int p^{(n+1)} f[i, 1b] dp + \int p^n f[1, 0b] dp \\ &\quad - \int p^{(n+1)} f[i, 0b] dp \\ &= I^{(n+1)}[i, 1b] + I^n[i, 0b] - I^{(n+1)}[i, 0b]. \end{aligned}$$

**Lemma 2** *If  $Q$  hits  $b$ ,  $I^n[i, b]$  is represented as*

$$I^n[i, b] = \begin{cases} \frac{p^{n+1}}{n+1} & \text{if } b \in B \text{ and } |b| = m \\ 0 & \text{if } i < m. \end{cases}$$

**Proof)** Applying Equation (1) and Equation (2) respectively, the right terms are derived.

$$\begin{aligned} I^n[i, b] &= \int p^n f[i, b] dp = \int (p^n \cdot 1) dp = \frac{p^{n+1}}{n+1} \\ I^n[i, b] &= \int p^n f[i, b] dp = \int (p^n \cdot 0) dp = 0. \end{aligned}$$

**Lemma 3**  $I^n[i, 0b] = I^n[i - |b| + |b'|, 0b']$  where  $0b' = B(0b)$

**Proof)** Applying Equation (4), the right term is derived.

$$\begin{aligned} I^n[i, 0b] &- I^n[i - |b| + |b'|, 0b'] \\ &= \int p^n f[i, 0b] dp - \int p^n f[i - |b| + |b'|, 0b'] dp \\ &= \int (p^n f[i, 0b] - p^n f[i - |b| + |b'|, 0b']) dp \\ &= \int p^n (f[i, 0b] - f[i - |b| + |b'|, 0b']) dp \end{aligned}$$

$$\begin{aligned} &= \int p^n \cdot 0 \, dp \\ &= 0. \end{aligned}$$
