# Supplementary material for: Hit integration for identifying optimal spaced seeds
Source: PubMed Central journal article supplement (PMC3009509; doi:10.1186/1471-2105-11-s1-s37), 2010-01-18
Supplement: 1471-2105-11-S1-S37-S2.pdf [file 1471-2105-11-S1-S37-S2.pdf]

## Additional file 2

### Hit integrations of five dominant seeds

Table 1: Hit integrations of five dominant seeds: A: 111\*1\*\*11\*1\*1\*\*111, B: 111\*1\*1\*\*11\*1\*\*111, C: 111\*11\*\*1\*1\*\*1\*111, D: 11\*\*111\*1\*\*1\*111\*1, E: 1111\*1\*11\*\*1\*\*\*111. ‘\*’ marked seed is the seed that shows the highest hit integration value for each similarity range.

| similarity range               | seed | hit integration        |
|--------------------------------|------|------------------------|
| 0 ~<br>0.0524790924            | A*   | 3.256612342841852E-14  |
|                                | B    | 3.256612342749398E-14  |
|                                | C    | 3.256612341798721E-14  |
|                                | D    | 3.256612298819122E-14  |
|                                | E    | 3.2566115293013535E-14 |
| 0.0524790924 ~<br>0.0775105071 | A    | 7.289693279684254E-12  |
|                                | B*   | 7.289693295244111E-12  |
|                                | C    | 7.289693292109644E-12  |
|                                | D    | 7.2896922736172E-12    |
|                                | E    | 7.289680997729342E-12  |
| 0.0775105071 ~<br>0.7304317142 | A    | 0.0784639860717529     |
|                                | B    | 0.07864496902275496    |
|                                | C*   | 0.07868695000938536    |
|                                | D    | 0.07800419490374307    |
|                                | E    | 0.07806383405843921    |
| 0.7304317142 ~<br>0.9845899783 | A    | 0.9182755095478847     |
|                                | B*   | 0.9187732881727378     |
|                                | C    | 0.9186347185335761     |
|                                | D    | 0.9173105651704655     |
|                                | E    | 0.9173812480420739     |
| 0.9845899783 ~<br>0.9997355115 | A    | 0.999999999145007      |
|                                | B    | 0.9999999998955471     |
|                                | C    | 0.9999999998159751     |
|                                | D*   | 0.999999999357159      |
|                                | E    | 0.999999999871687      |
| 0.9997355115 ~<br>1.0          | A    | 0.9999999986121215     |
|                                | B    | 0.9999999985951211     |
|                                | C    | 0.9999999990853576     |
|                                | D    | 0.9999999979370978     |
|                                | E*   | 0.9999999993844448     |
